# Supplementary material for: A Red-Emitting Cu(I)–Halide Cluster Phosphor with Near-Unity Photoluminescence Efficiency for High-Power wLED Applications
Source: MDPI journal article supplement (doi:10.3390/molecules27144441), 2022-07-11
Supplement: s1 [file s1]

*Supporting Information (SI) for*

# **A Red-Emitting Cu(I)–Halide Cluster Phosphor with Near-Unity Photoluminescence Efficiency for High-Power wLED Applications**

**Wenjiang Zhaxi <sup>1</sup>, Miao Li <sup>1</sup>, Jing Wu <sup>1</sup>, Luying Liu <sup>1</sup>, Zetao Huang <sup>1</sup>, Huixian Miao <sup>1</sup>, Xiao Ma <sup>1</sup>, Shenlong Jiang <sup>2</sup>, Qun Zhang <sup>2</sup>, Wei Huang <sup>1,\*</sup> and Dayu Wu <sup>1,\*</sup>**

<sup>1</sup> Jiangsu Key Laboratory of Advanced Catalytic Materials and Technology, Advanced Catalysis & Green Manufacturing Collaborative Innovation Center, School of Petrochemical Engineering, Changzhou University, Changzhou 213164, China; e-mail@e-mail.com (W.Z.); 19070303220@smail.cczu.edu.cn (M.L.); 19085216335@smail.cczu.edu.cn (J.W.); 20085600204@smail.cczu.edu.cn (L.L.); 20085600200@smail.cczu.edu.cn (Z.H.); 20085600356@smail.cczu.edu.cn (H.M.); maxiao@cczu.edu.cn (X.M.)

<sup>2</sup> Hefei National Research Center for Physical Sciences at the Microscale, Department of Chemical Physics, Synergetic Innovation Center of Quantum Information & Quantum Physics, University of Science and Technology of China, Hefei 230026, China; poetjisl@ustc.edu.cn (S.J.); qunzh@ustc.edu.cn (Q.Z.)

\* Correspondence: whuang@cczu.edu.cn (W.H.) or wudy@cczu.edu.cn (D.W.)

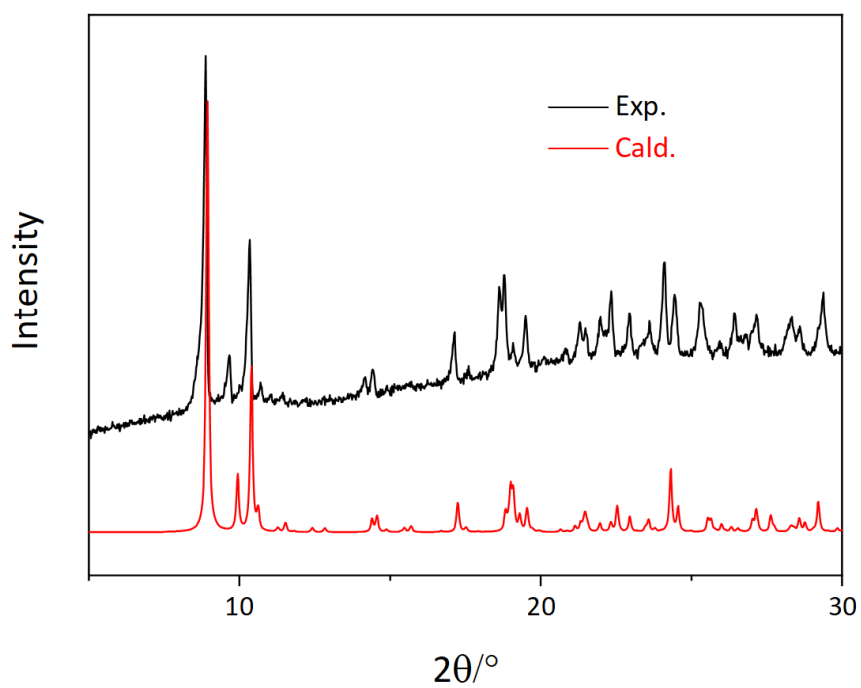

**Figure S1.** The powder XRD patterns of  $[\text{bppmCu}_2\text{I}_2]_2$ .

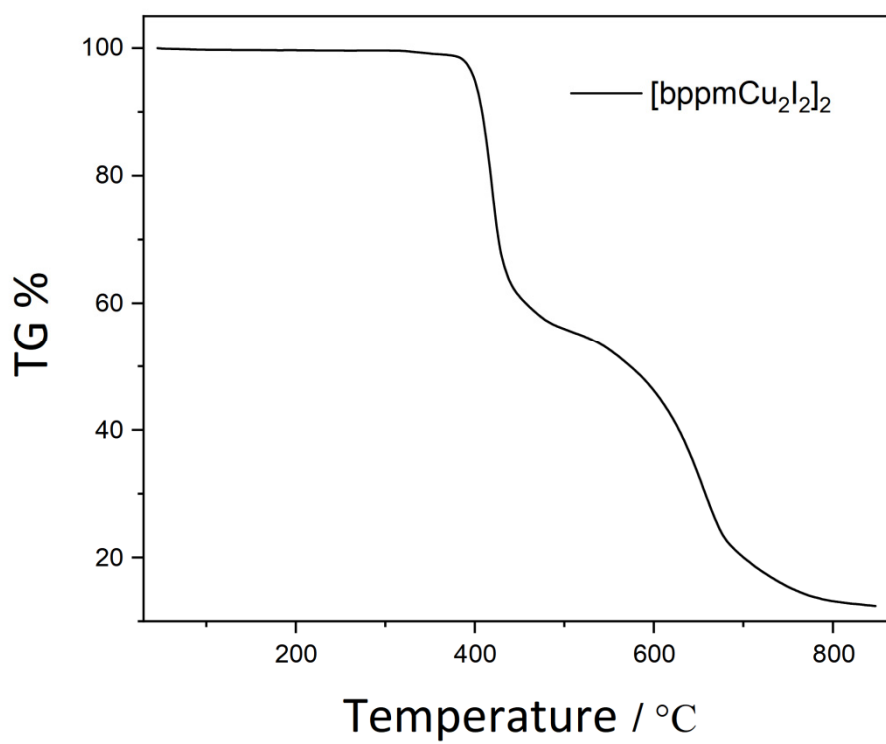

**Figure S2.** TGA diagram of  $[\text{bppmCu}_2\text{I}_2]_2$ .

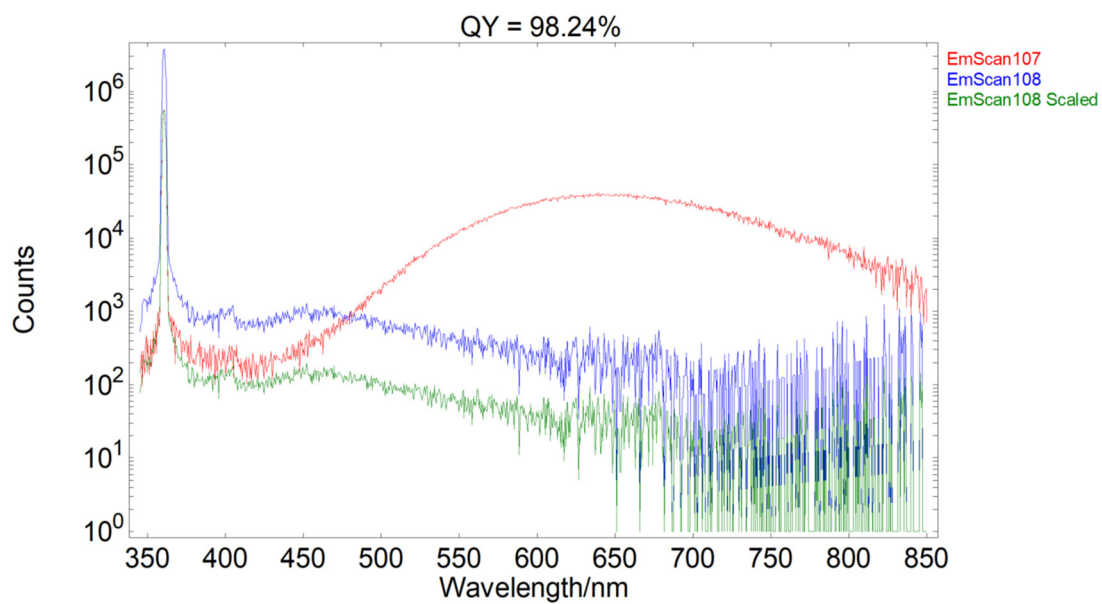

**Figure S3.** The measurements of PLQY for **[bppmCu<sub>2</sub>I<sub>2</sub>]<sub>2</sub>**.

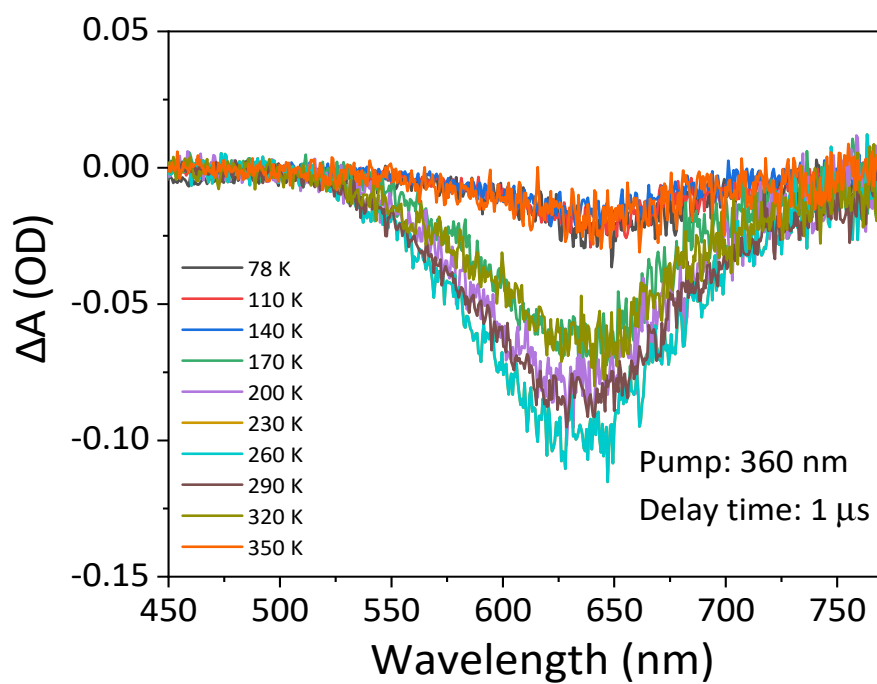

**Figure S4.** Temperature-dependent fs-TA spectra of **[bppmCu<sub>2</sub>I<sub>2</sub>]<sub>2</sub>** at the 1  $\mu$ s probe delay.

The fs-TA signal (that is, the absorbance changes) is given in OD which stands for optical density.

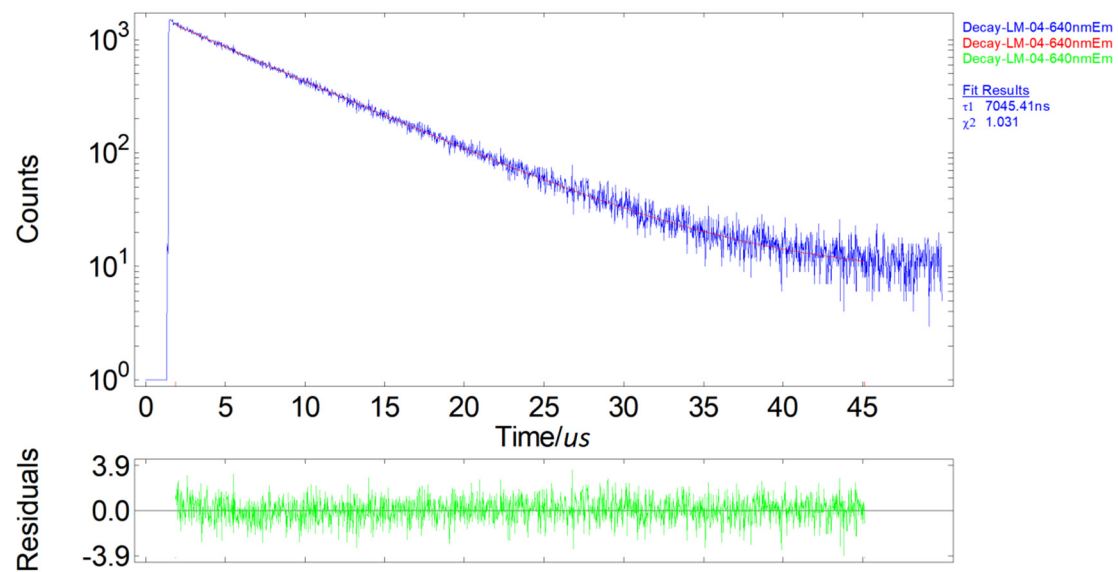

**Figure S5.** PL decay curve of  $[\text{bppmCu}_2\text{I}_2]_2$  at 298 K.

**Table S1.** The crystallographic data and refinement parameters at 100K.

| Complex                                                                                              | C <sub>25</sub> H <sub>22</sub> I <sub>2</sub> Cu <sub>2</sub> P <sub>2</sub> |
|------------------------------------------------------------------------------------------------------|-------------------------------------------------------------------------------|
| Temperature (K)                                                                                      | 100                                                                           |
| Formula weight                                                                                       | 765.24                                                                        |
| Crystal system                                                                                       | orthorhombic                                                                  |
| Space group                                                                                          | <i>Pbca</i>                                                                   |
| <i>a</i> [Å]                                                                                         | 16.6523(3)                                                                    |
| <i>b</i> [Å]                                                                                         | 17.0061(3)                                                                    |
| <i>c</i> [Å]                                                                                         | 17.7846(3)                                                                    |
| $\alpha$ [°]                                                                                         | 90                                                                            |
| $\beta$ [°]                                                                                          | 90                                                                            |
| $\gamma$ [°]                                                                                         | 90                                                                            |
| <i>V</i> [Å <sup>3</sup> ]                                                                           | 5036.43(15)                                                                   |
| <i>Z</i>                                                                                             | 8                                                                             |
| <i>F</i> (000)                                                                                       | 2928                                                                          |
| <i>R</i> <sub>1</sub> <sup>a</sup> / <i>wR</i> <sub>2</sub> <sup>b</sup> [ <i>I</i> >2σ( <i>I</i> )] | 0.0215/0.0447                                                                 |
| <i>R</i> <sub>1</sub> / <i>wR</i> <sub>2</sub> ( <i>all data</i> )                                   | 0.0193/0.0439                                                                 |
| <i>GOF</i> <sup>c</sup> on <i>F</i> <sup>2</sup>                                                     | 1.043                                                                         |

<sup>a</sup>  $R_1 = \sum ||F_o| - |F_c|| / \sum |F_o|$ , <sup>b</sup>  $wR_2 = \{\sum [w(F_o^2 - F_c^2)^2] / \sum [w(F_o^2)^2]\}^{1/2}$ .

<sup>c</sup> *Goodness-of-fit* =  $[\sum [w(F_o^2 - F_c^2)^2] / (N_{\text{obs}} - N_{\text{params}})]^{1/2}$ , based on the data *I* > 2σ(*I*).

**Table S2.** The selected bond distances (Å).

---

| C <sub>25</sub> H <sub>22</sub> Cu <sub>2</sub> I <sub>2</sub> P <sub>2</sub> |            |
|-------------------------------------------------------------------------------|------------|
| Cu1 P2                                                                        | 2.2399(4)  |
| Cu1 I2                                                                        | 2.6758(2)  |
| Cu1 I1                                                                        | 2.6946(2)  |
| Cu1 Cu2                                                                       | 2.7309(3)  |
| Cu1 I1                                                                        | 2.7366(2)  |
| Cu2 P1                                                                        | 2.2096(4)  |
| Cu2 I2                                                                        | 2.5176(2)  |
| Cu2 I1                                                                        | 2.6411(2)  |
| P1 C5                                                                         | 1.8202(16) |
| P1 C12                                                                        | 1.8294(15) |
| P1 C13                                                                        | 1.8286(15) |
| P2 C18                                                                        | 1.8230(16) |
| P2 C24                                                                        | 1.8230(15) |
| P2 C13                                                                        | 1.8347(14) |

---

**Table S3.** The EL parameters of **[bppmCu<sub>2</sub>I<sub>2</sub>]<sub>2</sub>**-based LED.

|             |        |        |        |        |        |        |        |        |        |        |
|-------------|--------|--------|--------|--------|--------|--------|--------|--------|--------|--------|
| Current [A] | 0.1    | 0.2    | 0.3    | 0.4    | 0.5    | 0.6    | 0.7    | 0.8    | 0.9    | 1.0    |
| Potential/V | 3.04   | 3.12   | 3.2    | 3.27   | 3.34   | 3.42   | 3.5    | 3.57   | 3.65   | 3.74   |
| CIE x       | 0.5888 | 0.5973 | 0.5879 | 0.5882 | 0.5752 | 0.5762 | 0.563  | 0.5572 | 0.544  | 0.5546 |
| CIE y       | 0.3112 | 0.3373 | 0.3427 | 0.3407 | 0.3438 | 0.3403 | 0.3409 | 0.3418 | 0.3404 | 0.3416 |
| R1          | 70.5   | 65.8   | 79     | 75.3   | 69.8   | 46.6   | 80.6   | 73.1   | 81.9   | 50.8   |
| R2          | 89.8   | 79.3   | 92     | 89.5   | 82.4   | 58.8   | 92.8   | 85     | 93.5   | 62.4   |
| R3          | 87.5   | 91.2   | 94.8   | 95.9   | 93.4   | 68.1   | 95.3   | 94.8   | 95.3   | 70.9   |
| R4          | 54.9   | 83.2   | 69.9   | 67.6   | 83     | 90.6   | 71.6   | 82.3   | 73.4   | 91.1   |
| R5          | 67.5   | 91.1   | 76.8   | 74.9   | 90.3   | 84.1   | 78.5   | 89.5   | 80.3   | 85.4   |
| R6          | 87.6   | 92.6   | 90.3   | 89.2   | 95.1   | 69.7   | 90.3   | 96.6   | 91     | 72.2   |
| R7          | 76.8   | 67.6   | 82.2   | 80     | 70.8   | 45.5   | 82.7   | 73.3   | 82.8   | 48.4   |
| R8          | 63     | 55.1   | 69.8   | 66.1   | 59     | 32.8   | 71.7   | 62.6   | 72.9   | 36.8   |
| R9          | 39.6   | 41.2   | 49.7   | 44.5   | 45     | 29.2   | 53     | 48.7   | 55.2   | 33.7   |
| R10         | 84.1   | 68     | 84.9   | 80.6   | 72.1   | 39.9   | 85.6   | 75.5   | 86.7   | 44.8   |
| R11         | 45     | 76.5   | 64     | 59.8   | 76.3   | 95.6   | 65.3   | 75.9   | 67.4   | 95.1   |
| R12         | 79.6   | 88.7   | 79.7   | 75.2   | 85.6   | 88.6   | 76.6   | 82.4   | 75.4   | 86.8   |
| R13         | 73.2   | 63.8   | 80.9   | 76.9   | 68.6   | 38.1   | 82.7   | 72.7   | 84.2   | 43.4   |
| R14         | 94.8   | 91.2   | 98.4   | 98.5   | 93.3   | 76.5   | 98.4   | 94.5   | 98.3   | 78.7   |
| R15         | 74.4   | 66.5   | 80.3   | 77.1   | 71     | 46.8   | 83     | 75     | 84.9   | 51.7   |
| Ra          | 74.7   | 78.2   | 81.8   | 79.8   | 80.5   | 62     | 82.9   | 82.1   | 83.9   | 64.7   |
| CCT [K]     | 1101   | 1184   | 1250   | 1238   | 1314   | 1292   | 1360   | 1394   | 1460   | 1408   |

**Table S4.** The EL parameters of [bppmCu<sub>2</sub>I<sub>2</sub>]<sub>2</sub>-based pc-wLED.

|             |        |        |        |        |        |        |       |        |        |        |
|-------------|--------|--------|--------|--------|--------|--------|-------|--------|--------|--------|
| Current/A   | 0.1    | 0.2    | 0.3    | 0.4    | 0.5    | 0.6    | 0.7   | 0.8    | 0.9    | 1.0    |
| Potential/V | 3.03   | 3.12   | 3.2    | 3.27   | 3.35   | 3.43   | 3.51  | 3.59   | 3.68   | 3.77   |
| CIE x       | 0.297  | 0.3108 | 0.3156 | 0.3206 | 0.3207 | 0.3263 | 0.323 | 0.3255 | 0.3222 | 0.3245 |
| CIE y       | 0.3188 | 0.3231 | 0.3234 | 0.3275 | 0.3282 | 0.3325 | 0.338 | 0.3442 | 0.3477 | 0.3564 |
| R1          | 62.9   | 63.5   | 63.9   | 68.8   | 70.9   | 81.1   | 73.4  | 79.4   | 81.7   | 87.6   |
| R2          | 73.6   | 75.6   | 76     | 79.7   | 81.6   | 90     | 82.2  | 86.1   | 87.6   | 96     |
| R3          | 84.1   | 87.7   | 88.2   | 89.8   | 91.2   | 92.4   | 90    | 91.2   | 91.5   | 98.2   |
| R4          | 84.7   | 79.3   | 76.6   | 74.7   | 76.1   | 70.5   | 83.1  | 83.1   | 88.3   | 90.4   |
| R5          | 86.1   | 78.4   | 75.2   | 73.2   | 73.8   | 67.9   | 81.7  | 82.7   | 88.2   | 82.8   |
| R6          | 86.9   | 81.6   | 78.9   | 77.3   | 75.9   | 69.9   | 81.8  | 84     | 86     | 74.4   |
| R7          | 73.2   | 75.8   | 77.6   | 82.1   | 80.5   | 84.6   | 80.7  | 85.8   | 83.3   | 73.6   |
| R8          | 43.5   | 45.2   | 46.9   | 53.7   | 55.9   | 67.8   | 60.1  | 68     | 69.7   | 71     |
| R9          | 44.8   | 42.2   | 39.9   | 28.2   | 50.1   | 62.9   | 60.2  | 62.2   | 23.5   | 46.4   |
| R10         | 45.3   | 47.2   | 47     | 52.7   | 56     | 68     | 59.7  | 66.8   | 70.8   | 86.1   |
| R11         | 84.6   | 76.4   | 73.1   | 71.6   | 72.5   | 67.8   | 80.3  | 81.6   | 87.1   | 87.2   |
| R12         | 82.3   | 76.7   | 72.9   | 71.5   | 72.2   | 68.9   | 78.9  | 81.1   | 86.7   | 89.2   |
| R13         | 61.8   | 64     | 64.7   | 70.2   | 72.8   | 84.9   | 74.1  | 80.1   | 82.1   | 90.3   |
| R14         | 90.2   | 92.6   | 93     | 93.7   | 94.8   | 94.9   | 94.2  | 94.7   | 95     | 98.8   |
| R15         | 52.6   | 54.1   | 54.9   | 60.7   | 63.7   | 75.3   | 67.7  | 74.4   | 77.6   | 87.8   |
| Ra          | 74.4   | 73.4   | 72.9   | 74.9   | 75.7   | 78     | 79.1  | 82.5   | 84.5   | 84.2   |
| CCT [K]     | 7573   | 6664   | 6388   | 6092   | 6084   | 5789   | 5939  | 5806   | 5949   | 5828   |
